# Supplementary material for: Tailored Synthesis of Catalytically Active Cerium Oxide for N, N-Dimethylformamide Oxidation
Source: MDPI journal article supplement (doi:10.3390/ma16020865), 2023-01-16
Supplement: s1 [file s1]

# Supplementary Material

## Tailored Synthesis of Catalytically Active Cerium Oxide for N, N-Dimethylformamide Oxidation

Cedric Karel Fonzeu Monguen <sup>1,2,†</sup>, En-Jie Ding <sup>1,3,†</sup>, Samuel Daniel <sup>1,2</sup>, Jing-Yang Jia <sup>1,3</sup>,  
Xiao-Hong Gui <sup>3</sup> and Zhen-Yu Tian <sup>1,2,\*</sup>

<sup>1</sup> Institute of Engineering Thermophysics, Chinese Academy of Sciences, Beijing 100190, China; karel@iet.cn (C.K.F.M.); dingenjie@iet.cn (E.-J.D.); samuel@iet.cn (S.D.); jiajingyang@iet.cn (J.-Y.J.)

<sup>2</sup> University of Chinese Academy of Sciences, Beijing 100049, China

<sup>3</sup> School of Emergency Management and Safety Engineering, China University of Mining and Technology, Beijing 100083, China; gxhbox@sina.com

\* Correspondence: tianzhenyu@iet.cn; Tel./Fax: +86-10-8254-3305

† These authors contributed equally to this work.

## Table of Contents

|                                                                  |   |
|------------------------------------------------------------------|---|
| <b>Section S1:</b> Synthesis method of as-prepared samples ..... | 2 |
| <b>Section S2:</b> Experimental setup for catalytic tests .....  | 3 |
| <b>Section S3:</b> Catalyst structure .....                      | 4 |
| <b>Section S4:</b> Catalytic performance .....                   | 5 |
| <b>References</b> .....                                          | 6 |

## Section S1: Synthesis method of as-prepared samples

Cerium oxides ( $\text{CeO}_x$ ) was prepared using sol-gel method. The different reaction occurs during the preparation are:

- ✚ Step 1: Dissolution of the precursor for homogeneity
- ✚ Step 2: Hydrolysis of the precursor in NaOH
- ✚ Step 3: condensation using ethanol and ammoniac sodium
- ✚ Step 4: Vaporization of the solvent and the gel formation
- ✚ Step 5: calcination and growth of the particle

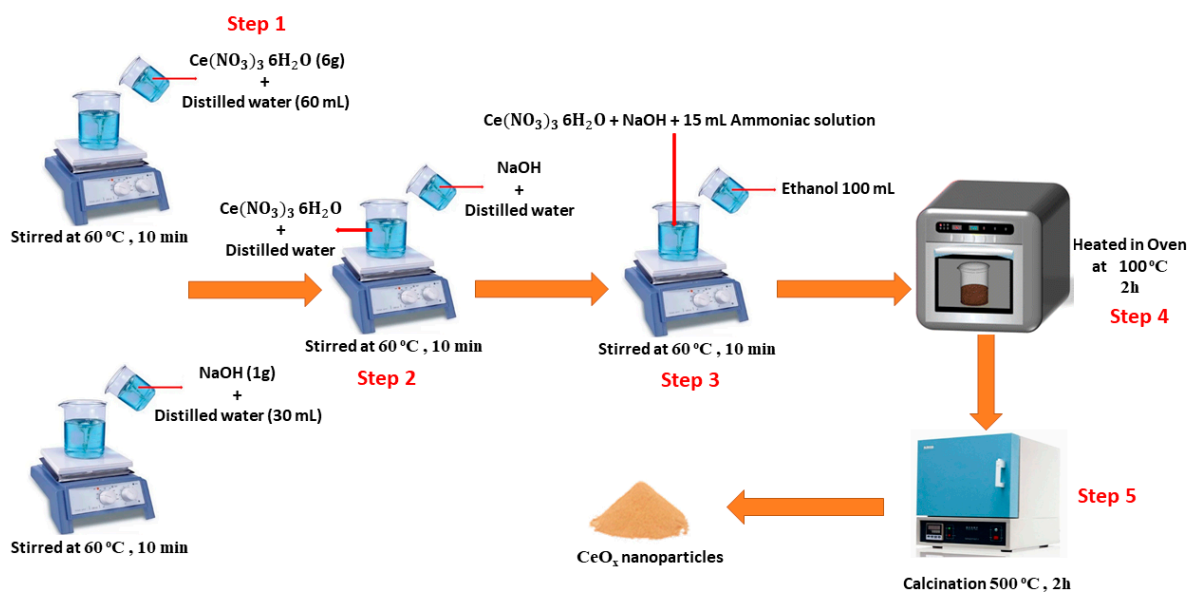

**Figure S1.** Sol-gel setup for the nanoparticles catalyst preparation [1, 2].

## Section S2: Experimental setup for catalytic tests

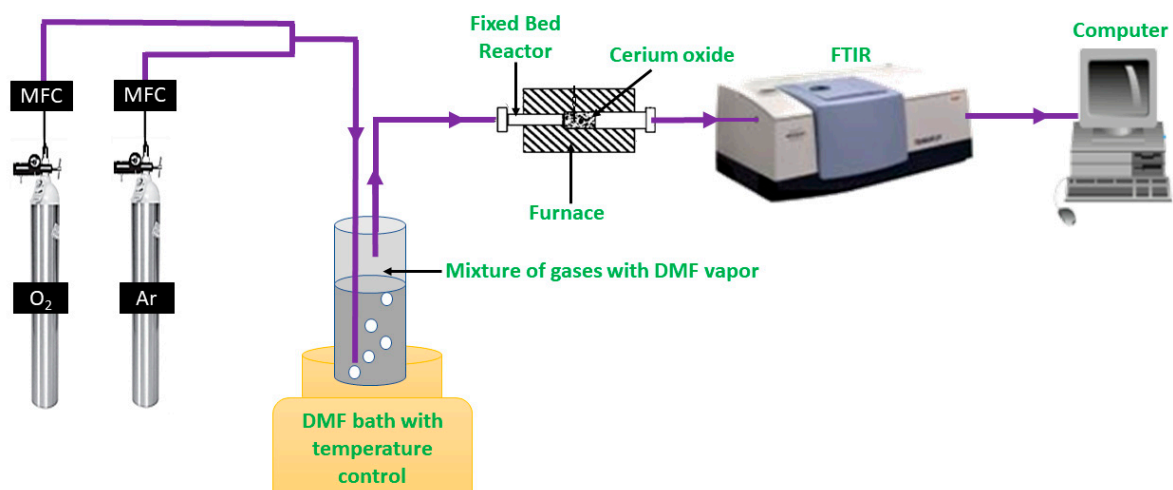

**Figure S2.** The catalytic test system is connected to the FTIR setup for the exhaust gas analysis.

### Section S3: Catalyst structure

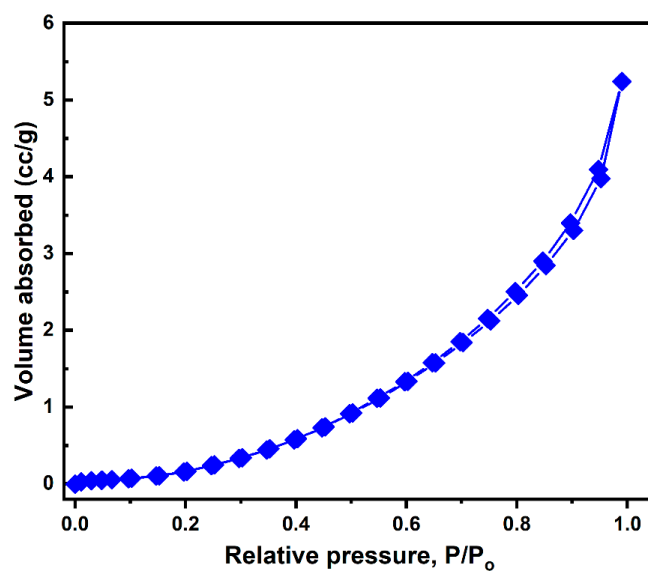

**Figure S3:** BET surface area analysis of CeO<sub>x</sub>: Adsorption-desorption isotherms curves.

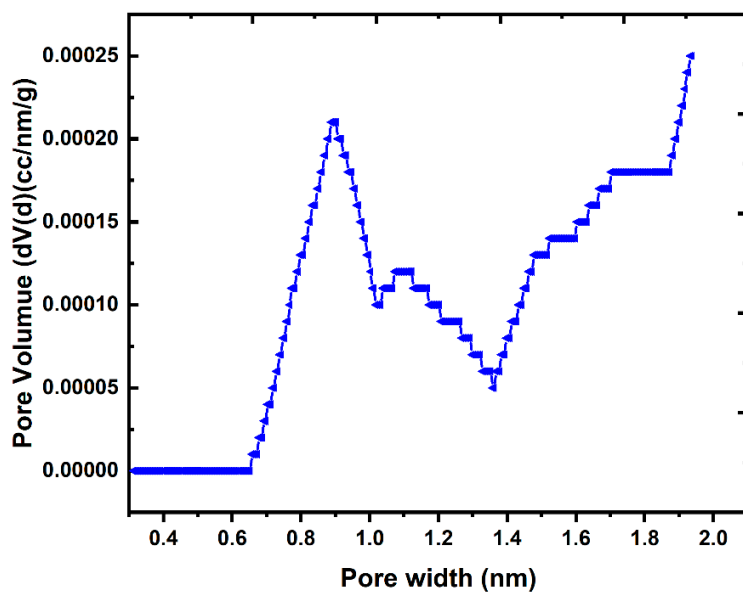

**Figure S4:** Pore size distribution.

#### Section S4: Catalytic performance

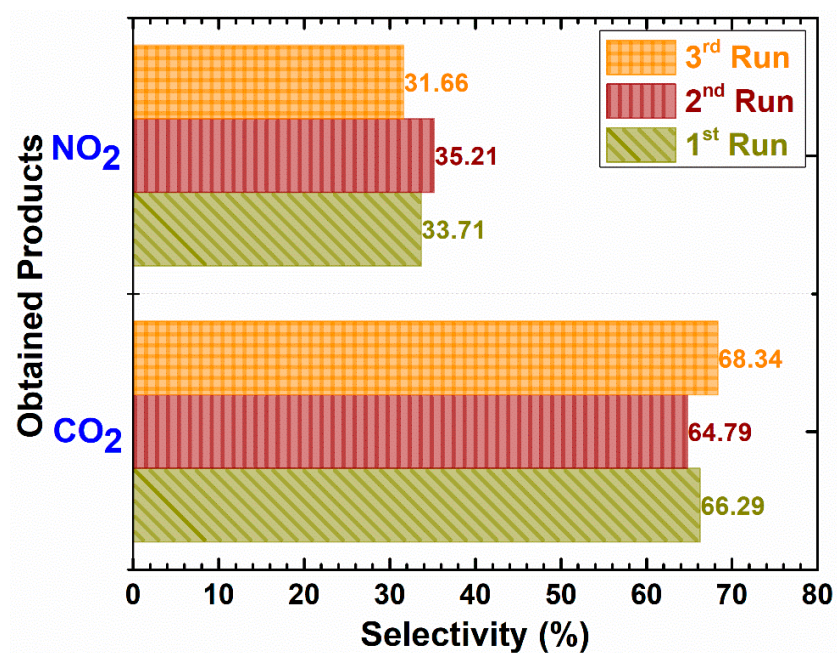

Figure S5: Reproducibility of the selectivity of the products.

## References

- [1] Fonzeu Monguen, C.K.; El Kasmi, A.; Arshad, M.F.; Kouotou, P.M.; Daniel, S.; Tian, Z.Y. Oxidative Dehydrogenation of Propane into Propene over Chromium Oxides. *Ind. Eng. Chem. Res.* **2022**, *61*, 4546–4560. <https://doi.org/10.1021/acs.iecr.2c00813>.
- [2] Daniel, S.; Monguen, C.K.F.; El Kasmi, A.; Arshad, M.F.; Tian, Z.Y. 2022. Oxidative Dehydrogenation of Propane to Olefins Promoted by Zr Modified ZSM-5. *Catal. Lett.* **2022**, 1–15. <https://doi.org/10.1007/s10562-022-03977-6>.
